# Supplementary material for: Value of preoperative prognostic nutritional index combined with NT-proBNP in predicting acute kidney injury of congenital heart disease children
Source: PeerJ journal article supplement (doi:10.7717/peerj.18085), 2024-09-18
Supplement: data.xlsx [file data.xlsx]

## Sheet: AKI group (n=32)
No	Age	Gender	BMI (kg/m2)	Type	RACHS-1 grade	LVEF (%)	Surgical time (min)	CPB time(min)	Aortic cross-clamp time (min)	Ventilation time (h)	ICU stay (d)	Scr (μmol/L)	24-hour urine output (ml/kg)	Albumin (g/L)	Total lymphocyte count (×109/L)	PNI	NT-proBNP(pg/ml)
1	3	Male	19.38	Tetralogy Fallot	6	70.77	170.2	98.8	66.1	10.1	9	507	24.1	46.6	2.1	34	1169.6
2	4	Male	24.5	Atrial/Ventricular septal defect	3	70.49	148.1	100	64.9	13.8	9	507.5	20.2	49	0.8	55	1263.4
3	4	Male	22.74	Patent ductus arteriosus	6	71.03	171.3	99.7	74.2	13.1	10	604.8	30.9	34.7	1.8	41	824.8
4	4	Female	22.27	Atrial/Ventricular septal defect	3	72.33	169.7	103.7	65	10.7	9	531.9	31.5	37.3	1.7	46	862.6
5	5	Male	23.83	Patent ductus arteriosus	2	56.92	144.2	101.9	71.1	15.8	9	570	36.6	41.2	1.4	42	978.2
6	4	Male	16.98	Tetralogy Fallot	1	70.27	141.4	102.3	61.6	11.1	9	393.4	43.6	39.9	1.4	48	842.7
7	4	Female	22.73	Patent ductus arteriosus	2	64	181.5	100.2	62.7	14.2	9	420.4	65	37	2.2	45	1091.3
8	5	Female	28.25	Patent ductus arteriosus	6	59.18	141.6	101.4	67.4	12.1	10	511.2	18.8	48.9	1.3	51	971
9	4	Female	22	Atrial/Ventricular septal defect	2	69.38	161.4	106.9	64.8	12.9	9	569.4	52.8	52.6	1.3	42	989.1
10	4	Female	25.92	Atrial/Ventricular septal defect	2	76.49	140.3	96.9	70.8	10.6	8	243.9	14.5	40.1	1.6	36	1023.8
11	4	Male	19.15	Tetralogy Fallot	2	59.97	157.5	96.7	60.5	11.8	9	463.1	19	52.8	2.5	36	1263.9
12	5	Male	16.69	Patent ductus arteriosus	3	74.16	140.9	101.9	64.4	8.5	10	487.5	55	44	1.5	49	1288.6
13	4	Male	28.79	Patent ductus arteriosus	6	69.57	162.1	103.6	70.5	11.4	11	473	31.6	45.3	0.9	42	1045.2
14	4	Female	22.56	Patent ductus arteriosus	1	81.79	142.9	108.7	68.5	9.1	9	483.9	68.1	41.3	2.8	43	1275.8
15	3	Female	18.73	Atrial/Ventricular septal defect	2	65.89	163	98.9	69.2	12.7	10	416	35.2	29.7	0.5	37	1019.2
16	4	Male	22.87	Atrial/Ventricular septal defect	2	77.15	149.4	95.8	77.7	8.1	9	395.1	54.4	42.6	2.3	41	966.3
17	4	Male	24.13	Patent ductus arteriosus	2	64	137.3	102.5	67.5	9	10	411.6	36.7	49.8	1.1	40	929.1
18	4	Female	24.71	Atrial/Ventricular septal defect	3	72.53	150.5	102.4	70	11	9	419.2	37	63.4	1.8	47	984.3
19	3	Male	27.04	Patent ductus arteriosus	3	58.86	146.5	105.3	69	13.7	10	461.8	45.8	39	2.6	49	848.3
20	5	Male	21.58	Tetralogy Fallot	6	68.73	143.4	100	67.7	10.5	9	383.4	23.5	53.2	0.5	34	873.3
21	4	Female	20.39	Patent ductus arteriosus	2	64.53	141	95.8	68	10.7	9	591.7	26	43.8	2	35	981.4
22	4	Male	20.96	Tetralogy Fallot	2	71.05	150.5	101.1	70	12.2	9	480.7	45.1	41.8	2.2	37	899.9
23	4	Female	20.86	Tetralogy Fallot	3	63.03	160.3	109.2	73.9	11.1	11	506.5	15.7	48.3	1.6	27	1065.3
24	4	Male	27.28	Patent ductus arteriosus	2	63.04	134.1	96.3	67.7	15.2	10	597.2	24.4	30.6	1.3	61	1149.6
25	4	Female	22.42	Atrial/Ventricular septal defect	6	74.71	140.5	94.8	66.4	11.1	10	570.7	38	35.7	1.2	45	991.8
26	5	Male	29.38	Atrial/Ventricular septal defect	3	68.48	147.9	100.9	76.8	8.9	9	478.8	40.5	41.8	1.7	46	1099.1
27	4	Female	24.23	Patent ductus arteriosus	2	67.29	140.7	99	68	12.3	9	411.5	15.4	55.1	1.9	33	1037.4
28	5	Male	24.19	Patent ductus arteriosus	3	67.52	158.2	104.5	74.4	13	9	343.3	44	39.4	1.9	37	1117
29	4	Male	23.6	Atrial/Ventricular septal defect	2	72.48	144.3	103.7	77	11	9	468	31.8	28.2	0.7	46	1057.9
30	4	Female	22.73	Others	2	56.41	148.4	102.9	67	11.7	9	571.3	35.5	35.8	1.8	52	975
31	4	Male	22.61	Atrial/Ventricular septal defect	2	78.08	161.9	105.9	72.2	11.6	9	391.5	43.3	29.5	2.5	46	936.9
32	4	Female	25.38	Tetralogy Fallot	2	70.3	146	101.1	65.1	11.7	10	525.8	25.4	50.8	1.7	42	1215.9

## Sheet: non-AKI group (n=76)
No	Age	Gender	BMI (kg/m2)	Type	RACHS-1 grade	LVEF (%)	Surgical time (min)	CPB time(min)	Aortic cross-clamp time (min)	Ventilation time (h)	ICU stay (d)	Scr (μmol/L)	24-hour urine output (ml/kg)	Albumin (g/L)	Total lymphocyte count (×109/L)	PNI	NT-proBNP(pg/ml)
1	4	Female	29.26	Patent ductus arteriosus	2	67.09	151.9	75	53.8	4.4	3	68.1	43.6	48.4	2.1	48	717.4
2	4	Male	24.99	Patent ductus arteriosus	2	76.68	170	76.5	53.2	4.2	4	74.3	30.4	41.1	2.6	50	756.2
3	4	Male	22.6	Atrial/Ventricular septal defect	4	69.4	153.5	70.9	51.9	3.9	5	83.9	32.6	50.9	2.3	48	805
4	6	Male	35.5	Atrial/Ventricular septal defect	4	56.82	147.2	74.4	47.8	5.4	4	116.8	50.5	48.3	2.5	48	776.6
5	5	Male	21.89	Tetralogy Fallot	4	68.9	144.3	65	45.1	5	4	135.7	43.5	41.5	1.7	49	836.2
6	5	Male	22.85	Patent ductus arteriosus	2	62.73	159.1	74.7	54.2	2.8	5	112.3	9.2	47.3	1.5	46	652.8
7	5	Female	20.29	Patent ductus arteriosus	3	63.27	181.6	71.3	50.2	2.4	3	80.3	8.6	61.7	1.7	45	796.5
8	5	Female	18.21	Patent ductus arteriosus	2	56.94	133.7	73.5	42.4	7.8	4	109.4	64	43.6	1.1	50	693.5
9	5	Male	25.21	Tetralogy Fallot	2	78.21	150.4	77.8	49.1	3.9	5	84.3	30.2	48.1	1.4	54	890.3
10	5	Male	21.75	Patent ductus arteriosus	2	69.68	136.7	73.2	43.5	5.5	4	113.3	27	43.5	3.6	50	778.1
11	4	Male	24.72	Atrial/Ventricular septal defect	2	76.22	136.8	71.1	43.4	6.5	5	140.6	30	49.9	1.8	47	793.8
12	4	Female	20.44	Atrial/Ventricular septal defect	2	61.26	161.3	75.8	47.8	4.2	3	126.3	47.7	34.4	3	47	878
13	5	Male	28.8	Patent ductus arteriosus	3	63.29	167	80.6	48.6	6	5	115.7	35.4	47.9	2.5	47	772.8
14	5	Male	33.03	Patent ductus arteriosus	4	60.04	119.1	82.7	44.3	5.6	3	74.9	55.3	47.8	1.6	40	822
15	6	Male	23.1	Others	2	56.41	139.5	75.9	48.1	5.3	4	79.7	49.5	49.2	0.8	51	653.3
16	4	Male	25.78	Atrial/Ventricular septal defect	2	66.17	171	75.5	44	5.9	3	104.8	41	46.1	2.7	45	768.2
17	5	Female	16.73	Patent ductus arteriosus	2	79.47	126.9	78	55.5	5.3	4	49.5	23.2	36.9	2.3	49	854.2
18	5	Female	13.45	Tetralogy Fallot	3	72.68	162.2	73	59.6	4.1	4	113.7	45.3	47.4	3.2	44	683.8
19	4	Male	29.79	Atrial/Ventricular septal defect	2	68.98	152.7	75	50.2	3.1	5	109.4	42.3	46.5	0.6	48	787.5
20	5	Female	16.89	Patent ductus arteriosus	1	72.43	156.7	71.5	49.7	4.7	4	100	37	46.5	0.5	44	595.1
21	4	Female	18.88	Patent ductus arteriosus	4	72	146	79.2	52.9	4	4	125.3	39.9	50.8	2.3	48	658
22	6	Female	19.39	Others	1	59.77	136	72.6	53	3.7	4	117.5	37.7	45.9	2.2	47	822.7
23	4	Male	20.44	Patent ductus arteriosus	3	75.19	152.1	70.3	45.6	5.9	5	79.6	54.9	45.6	2	45	831.4
24	5	Male	24.05	Atrial/Ventricular septal defect	3	61.51	157.2	76.3	49.6	4.4	5	132.9	56	51.9	1.5	43	706.5
25	6	Female	25.8	Atrial/Ventricular septal defect	2	58.25	129.7	69.4	52.1	5.4	5	133.9	34.4	46.4	2.3	49	890.8
26	5	Male	23.52	Tetralogy Fallot	2	73.78	140.1	79.6	53.8	2.3	4	132.8	39.1	40.8	2.6	49	825.9
27	5	Male	22.86	Patent ductus arteriosus	2	57.76	145.1	69.4	48.4	6.8	5	65.6	31.4	43.5	2	39	748.9
28	4	Female	21.8	Patent ductus arteriosus	3	64.89	150.9	72.3	39.4	4.6	3	160.9	24.3	40.6	2.3	47	882.4
29	4	Male	20.95	Atrial/Ventricular septal defect	2	65.82	144.3	79.6	47.5	6.3	4	124.3	55.5	41.5	2.1	48	810.1
30	5	Female	27.4	Tetralogy Fallot	2	75.19	164.6	77.5	65.5	4.6	4	71.8	40.7	51.7	1.9	45	830.4
31	3	Male	24.92	Atrial/Ventricular septal defect	2	67.32	136.9	71	40.3	5.6	5	116.9	13.9	52	2.2	47	690.1
32	4	Female	24.43	Tetralogy Fallot	3	61.44	165.8	81.6	56.2	4.2	3	108.4	15.7	51.5	1.9	48	897.6
33	3	Male	23.71	Atrial/Ventricular septal defect	2	65.68	155.7	70.6	54.3	6.1	4	96.5	42.1	50.1	2.1	44	761.8
34	5	Female	25.72	Atrial/Ventricular septal defect	2	71.35	138.7	76.8	45.8	6.2	5	76.7	38.3	58.7	1.9	48	606.4
35	6	Female	24.8	Tetralogy Fallot	2	53.82	176.2	77.7	48.1	6	3	103.7	40.5	47.4	2.3	53	801.4
36	4	Male	19.26	Tetralogy Fallot	1	67.43	180	73.4	52.3	4.3	4	152.7	28.8	41.6	1.7	47	667.4
37	6	Female	21.47	Atrial/Ventricular septal defect	4	62.93	163.5	75.5	47.3	2.5	5	98.7	53.7	53.4	2.2	43	628
38	4	Female	25.38	Patent ductus arteriosus	2	54.97	150.8	69.9	41.5	5.6	5	111.8	38.7	42.9	1.5	46	807.2
39	4	Female	19.23	Tetralogy Fallot	2	73.27	145	76.1	48.3	4	4	96.5	47.2	40.7	0.3	47	832.5
40	6	Female	24.26	Atrial/Ventricular septal defect	3	64.04	145.7	82.3	44.8	5.6	3	110.8	63.1	47	2.3	47	853
41	5	Female	34.37	Atrial/Ventricular septal defect	2	76.02	179.1	73.2	51	5.8	5	129.5	56.3	56.1	1.7	48	843.3
42	5	Male	20.39	Tetralogy Fallot	4	66.68	143.6	72.4	57.7	6.1	5	69	63.2	50	1.7	42	839
43	5	Male	20.15	Atrial/Ventricular septal defect	1	71.91	145.1	69.1	56	3.7	5	111.1	58.3	43.3	0.8	44	736.1
44	5	Female	27.51	Patent ductus arteriosus	2	68.91	144.8	73.8	57.5	5.8	6	136.5	58.8	37	3.1	48	795.1
45	5	Male	14.49	Others	1	65.29	162.8	72.9	54.2	3.3	3	131.8	56.3	43.7	1.5	40	760.7
46	5	Male	24.45	Patent ductus arteriosus	1	57.98	152.4	75.1	51.2	3.2	3	124.7	28.4	43.6	1.2	46	798.6
47	5	Male	24.96	Patent ductus arteriosus	3	80.25	151.2	81.8	44.9	5.1	4	130	54	38.7	1.3	47	802.5
48	5	Male	23.93	Atrial/Ventricular septal defect	4	72.21	151.4	76.5	49.2	3	3	55.4	73.7	48.6	2.7	47	999.6
49	5	Female	19.07	Atrial/Ventricular septal defect	3	76.7	174	77.6	47.1	4.6	4	91.4	26	49.7	1.7	44	743.4
50	6	Female	21.27	Patent ductus arteriosus	2	64.57	150.2	72.1	44.2	5.1	3	113	25.5	45.7	2.9	52	740
51	5	Male	18.68	Tetralogy Fallot	1	70.78	161.5	70.3	45.2	3.9	4	85.6	55.2	50	1.7	43	780.3
52	6	Female	24.08	Patent ductus arteriosus	2	55.69	136.5	80.6	44.2	5.4	4	98.5	50.6	47.8	3.2	50	824.2
53	4	Male	17.67	Atrial/Ventricular septal defect	3	69.41	144.6	77.5	42.6	3.9	5	125.8	34.1	44.8	1.3	49	832.5
54	6	Male	22.48	Atrial/Ventricular septal defect	3	61.63	156.9	68.4	58.5	6.3	3	89.7	19.4	43.4	1.2	50	717
55	5	Female	28.71	Atrial/Ventricular septal defect	3	77.32	140.8	71.4	44.1	4.4	3	129.2	53.3	48.9	2.5	50	907.4
56	5	Male	18.96	Atrial/Ventricular septal defect	2	55.71	146.4	74.8	43.7	3.4	4	61.3	30	45.8	2.2	42	600.5
57	5	Female	30.72	Patent ductus arteriosus	2	70.35	163	77.6	58.1	5	5	125.9	45	56.3	1.2	46	799.2
58	4	Male	28.7	Patent ductus arteriosus	3	60.35	160	81.3	47	6	4	108.5	30.5	52.4	2.8	46	981.3
59	5	Male	19.53	Patent ductus arteriosus	2	60.4	141.4	77.5	53	5	4	116.3	49.1	48.4	1.2	46	884.4
60	5	Female	18.51	Patent ductus arteriosus	3	68.38	132.3	72.9	39.5	2.9	4	99.9	69.1	37.5	1.8	52	859.4
61	5	Female	19.99	Patent ductus arteriosus	3	75.99	140.3	76.4	48.5	4.8	4	93.3	17.2	44.5	0.9	45	884.1
62	6	Male	25.65	Patent ductus arteriosus	2	77.97	141.4	68	46.6	2.8	4	120.3	22.4	51.2	1.8	50	798.8
63	5	Male	22.97	Patent ductus arteriosus	2	72.39	145.5	72.6	50.3	6.2	5	123.9	61.7	56.5	3.2	49	735.4
64	5	Female	16.92	Others	2	72.1	155	74.3	53.2	4.4	4	136.1	41.1	40	1.4	46	892.1
65	5	Male	30.01	Patent ductus arteriosus	2	65.76	145.9	73.8	33.3	4.2	4	114.9	32.5	43	2.1	50	531.9
66	4	Female	21.34	Patent ductus arteriosus	3	66.58	139.3	78	61.5	5.5	6	75.9	37.6	41	1	44	912.6
67	4	Male	19.38	Atrial/Ventricular septal defect	2	49.75	155.8	71.3	38.2	6	4	108.4	30.6	49	2.4	46	944
68	5	Male	24.27	Tetralogy Fallot	2	72.86	140.1	73.9	54.1	4.8	4	98.9	33	47.5	2.3	45	662.2
69	5	Female	23.73	Patent ductus arteriosus	1	74.82	154.3	67.7	51.4	3.9	4	138.9	46.4	47.2	1.6	44	580.2
70	6	Male	24.98	Atrial/Ventricular septal defect	2	68.31	128.5	73.4	57	5.4	4	145.2	16	48.2	2.6	45	840.8
71	6	Female	16.16	Patent ductus arteriosus	2	68.47	151	71.3	41.1	4.1	2	119	27.6	49.2	1.4	41	883.6
72	5	Female	21.87	Patent ductus arteriosus	4	65.94	172.1	84.2	45.2	5.5	4	153.6	31.9	51.6	2	47	743.5
73	5	Male	25.64	Tetralogy Fallot	3	70.6	156	76.5	57.2	5.1	6	76.1	19.2	51.1	0.7	44	817.6
74	4	Female	26.99	Atrial/Ventricular septal defect	3	70.93	159.5	89	51.3	3.7	6	173.2	50.1	51.7	1.9	42	801.5
75	4	Male	21.15	Patent ductus arteriosus	2	60.79	135.8	77.7	49.1	5.8	3	161.3	31.7	49	1.7	45	911.9
76	4	Male	21.01	Atrial/Ventricular septal defect	3	72.42	154.7	74.4	52.4	8.6	3	118.3	28.5	45.2	2	51	839.3
